# Supplementary material for: Beyond misinformation: developing a public health prevention framework for managing information ecosystems
Source: PubMed Central journal article supplement — Lancet Public Health. Author manuscript; Available in PMC 2024 Sep 3. (PMC11369959; doi:10.1016/s2468-2667(24)00031-8), 2024-04-20
Supplement: NIHMS2015266-supplement-SuplementaryIndex.pdf [file NIHMS2015266-supplement-SuplementaryIndex.pdf]

# THE LANCET

## Public Health

### Supplementary appendix

This appendix formed part of the original submission and has been peer reviewed.  
We post it as supplied by the authors.

Supplement to: Ishizumi A, Kolis J, Abad N, et al. Beyond misinformation: developing a public health prevention framework for managing information ecosystems. *Lancet Public Health* 2024; published online April 19. [https://doi.org/10.1016/S2468-2667\(24\)00031-8](https://doi.org/10.1016/S2468-2667(24)00031-8).

Supplementary Table: Documents Included in the Narrative Review of Infodemic Management Interventions and Reasons for Inclusion

| <b>Level of Prevention</b> | <b>Title</b>                                                                                                                                                                   | <b>Author(s)</b>                                   | <b>Year(s) Published</b> | <b>Type of Document</b> | <b>Reason(s) for Inclusion</b>                                                                                                                                                |
|----------------------------|--------------------------------------------------------------------------------------------------------------------------------------------------------------------------------|----------------------------------------------------|--------------------------|-------------------------|-------------------------------------------------------------------------------------------------------------------------------------------------------------------------------|
| Primordial                 | Acceptance and Adoption of Protective Measures During the COVID-19 Pandemic: The Role of Trust in Politics and Trust in Science                                                | Dohle S, Wingen T, Schreiber M.                    | 2020                     | Journal article         | Describes a study that identified trust in politics and science as a predictor of adoption of protective measures, with implications for building and maintaining trust       |
| Primordial                 | Trust in Science, Perceived Vulnerability to Disease, and Adherence to Pharmacological and Non-pharmacological COVID-19 Recommendations                                        | Hromatko I, Tonković M, Vranic A.                  | 2021                     | Journal article         | Describes a study that identified trust in science as a predictor of intent to adhere to COVID-19 recommendations, with implications for building and maintaining trust       |
| Primordial                 | Beliefs in Conspiracy Theories and Misinformation About COVID-19: Comparative Perspectives on the Role of Anxiety, Depression and Exposure to and Trust in Information Sources | De Coninck D, Frissen T, Matthijs K, <i>et al.</i> | 2021                     | Journal article         | Describes a study that examined how trust in COVID-19 information sources affects misinformation and conspiracy beliefs, with implications for building and maintaining trust |
| Primordial                 | Mitigating infodemics: The relationship                                                                                                                                        | Melki J, Tamim H, Hadid D, Makki                   | 2021                     | Journal article         | Describes a study that examined the relationship between trust in COVID-19                                                                                                    |

|            |                                                                                                                                                     |                                                        |      |                 |                                                                                                                                                                                                   |
|------------|-----------------------------------------------------------------------------------------------------------------------------------------------------|--------------------------------------------------------|------|-----------------|---------------------------------------------------------------------------------------------------------------------------------------------------------------------------------------------------|
|            | between news exposure and trust and belief in COVID-19 fake news and social media spreading                                                         | M, El Amine J, Hitti E.                                |      |                 | information sources and belief in myths and misinformation, with implications for building and maintaining trust                                                                                  |
| Primordial | Public trust, information sources and vaccine willingness related to the COVID-19 pandemic in Trinidad and Tobago: an online cross-sectional survey | De Freitas L, Basdeo D, Wang H-I.                      | 2021 | Journal article | Describes a study that found that higher levels of trust in the medical sector are associated with lower levels of belief in misinformation, with implications for building and maintaining trust |
| Primordial | Communicating risk in public health emergencies: a WHO guideline for emergency risk communication (ERC) policy and practice                         | WHO                                                    | 2018 | Guideline       | Introduces communication practices relevant to building or maintaining trust                                                                                                                      |
| Primordial | Trusted messengers and trusted messages: The role for community-based organizations in promoting COVID-19 and routine immunizations                 | Shen AK, Browne S, Srivastava T, Kornides ML, Tan ASL. | 2023 | Journal article | Describes a study that explored how community-based organizations build trust in their communities                                                                                                |
| Primordial | Community health workers' efforts to build health system trust in marginalised communities: a                                                       | Watkins JA, Griffiths F, Goudge J.                     | 2021 | Journal article | Describes a study that explored how community health workers build interpersonal trust with their patients                                                                                        |

|            |                                                                                                                                                                             |                                                                   |      |                 |                                                                                                                                                        |
|------------|-----------------------------------------------------------------------------------------------------------------------------------------------------------------------------|-------------------------------------------------------------------|------|-----------------|--------------------------------------------------------------------------------------------------------------------------------------------------------|
|            | qualitative study from South Africa                                                                                                                                         |                                                                   |      |                 |                                                                                                                                                        |
| Primordial | What matters to us: Bridging research and accurate information through dialogue (BRAID) to build community trust and cultivate vaccine confidence                           | Stephenson-Hunter C, Yusuf Y, Larson R, Campanella J, Gutnick DN. | 2023 | Journal article | Describes an intervention designed to build trust between healthcare systems and community members, and to address community-level information needs   |
| Primordial | Intervening on Trust in Science to Reduce Belief in COVID-19 Misinformation and Increase COVID-19 Preventive Behavioral Intentions: Randomized Controlled Trial             | Agley J, Xiao Y, Thompson EE, Chen X, Golzarri-Arroyo L.          | 2021 | Journal article | Describes a study that examined whether an intervention using an infographic can increase trust in science and thereby reduce belief in misinformation |
| Primordial | WHO policy brief: COVID-19: infodemic management                                                                                                                            | WHO                                                               | 2022 | Policy brief    | Provides an overview of key actions public health authorities can take to establish an infodemic management workforce                                  |
| Primordial | Establishing Infodemic Management in Germany: A Framework for Social Listening and Integrated Analysis to Report Infodemic Insights at the National Public Health Institute | Boender TS, Schneider PH, Houareau C, <i>et al.</i>               | 2023 | Journal article | Describes a process for establishing a workflow for reporting infodemic insights within a public health authority                                      |

|            |                                                                                                                                                               |                                                      |      |                                       |                                                                                                                                                       |
|------------|---------------------------------------------------------------------------------------------------------------------------------------------------------------|------------------------------------------------------|------|---------------------------------------|-------------------------------------------------------------------------------------------------------------------------------------------------------|
| Primordial | Training health professionals in infodemic management to mitigate the harm caused by infodemics                                                               | Purnat T, Bertrand-Ferrandis C, Yau B, <i>et al.</i> | 2022 | Journal article (conference abstract) | Describes a training program designed to build infodemic management capacity for health professionals                                                 |
| Primordial | E-learning: How to address online vaccination misinformation                                                                                                  | European Centre for Disease Prevention and Control   | 2022 | Online course                         | E-learning course designed to build capacity of public health practitioners in addressing online vaccine misinformation                               |
| Primordial | Community-oriented Motivational Interviewing (MI): A novel framework extending MI to address COVID-19 vaccine misinformation in online social media platforms | Scales D, Gorman JM, DiCaprio P, <i>et al.</i>       | 2023 | Journal article                       | Describes an intervention that involved training of infodemiologists in areas such as motivational interviewing to address online misinformation      |
| Primordial | Reducing Health Misinformation in Science: A Call to Arms                                                                                                     | Swire-Thompson B, Lazer D.                           | 2022 | Journal article                       | Describes potential interventions for promoting generation of accurate scientific information                                                         |
| Primordial | WHO Policy on Open Access                                                                                                                                     | WHO                                                  | n.d. | Webpage                               | Describes an example of interventions to promote generation of accessible scientific information at an organizational level                           |
| Primordial | Post retraction citations in context: a case study.                                                                                                           | Bar-Ilan J, Halevi G.                                | 2017 | Journal article                       | Describes a study that examined the nature of citations to retracted articles, with implications for generation of more reliable scientific knowledge |

|            |                                                                                                                                |                                                                          |      |                     |                                                                                                                                        |
|------------|--------------------------------------------------------------------------------------------------------------------------------|--------------------------------------------------------------------------|------|---------------------|----------------------------------------------------------------------------------------------------------------------------------------|
| Primordial | FAQs: DSA data access for researchers - European Commission.                                                                   | Joint Research Centre                                                    | 2023 | Webpage             | Describes an example of regulatory interventions that can facilitate the creation of robust scientific evidence                        |
| Primary    | Research progress on digital health literacy of older adults: A scoping review                                                 | Wang X, Luan W.                                                          | 2022 | Journal article     | Reviews multiple digital health literacy interventions for older adults                                                                |
| Primary    | Lateral reading: College students learn to critically evaluate internet sources in an online course                            | Breakstone J, Smith M, Connors P, Ortega T, Kerr D, Wineburg S.          | 2021 | Journal article     | Describes a study that tested whether a digital literacy intervention can improve college students' ability to evaluate online sources |
| Primary    | COVID-19 infodemic and digital health literacy in vulnerable populations: A scoping review                                     | Choukou M-A, Sanchez-Ramirez DC, Pol M, Uddin M, Monnin C, Syed-Abdul S. | 2022 | Journal article     | Reviews multiple interventions designed to support digital health literacy in marginalized populations                                 |
| Primary    | Evaluating a theory-based intervention for improving eHealth literacy in older adults: a single group, pretest–posttest design | Chang SJ, Lee K, Yang E, Ryu H.                                          | 2022 | Journal article     | Describes a study that evaluated an eHealth information education intervention designed for older adults                               |
| Primary    | A digital media literacy intervention for older adults improves resilience to fake news                                        | Moore RC, Hancock JT.                                                    | 2022 | Journal article     | Describes a study that examined the effect of a digital literacy training intervention for older adults                                |
| Primary    | Digital Health Literacy                                                                                                        | National Network of Libraries of Medicine                                | 2022 | Training curriculum | Materials for those interested in providing digital health training                                                                    |

|           |                                                                                                                                                           |                                                                              |      |                 |                                                                                                                        |
|-----------|-----------------------------------------------------------------------------------------------------------------------------------------------------------|------------------------------------------------------------------------------|------|-----------------|------------------------------------------------------------------------------------------------------------------------|
| Primary   | Countering Misinformation and Fake News Through Inoculation and Prebunking                                                                                | Lewandowsky S, van der Linden S.                                             | 2021 | Journal article | Reviews different prebunking and psychological inoculation techniques                                                  |
| Primary   | Psychological inoculation improves resilience against misinformation on social media                                                                      | Roozenbeek J, van der Linden S, Goldberg B, Rathje S, Lewandowsky S.         | 2022 | Journal article | Describes a series of studies that examined the effect of a video-based prebunking intervention                        |
| Primary   | The relative efficacy of various types of prior belief-defense in producing immunity against persuasion                                                   | McGuire WJ, Papageorgis D.                                                   | 1961 | Journal article | Introduces psychological inoculation theory                                                                            |
| Primary   | Towards psychological herd immunity: Cross-cultural evidence for two prebunking interventions against COVID-19 misinformation                             | Basol M, Roozenbeek J, Berriche M, Uenal F, McClanahan WP, Linden S van der. | 2021 | Journal article | Describes studies that examined the effects of game- and infographic-based prebunking interventions                    |
| Secondary | Infodemic Signal Detection During the COVID-19 Pandemic: Development of a Methodology for Identifying Potential Information Voids in Online Conversations | Purnat TD, Vacca P, Czerniak C, <i>et al.</i>                                | 2021 | Journal article | Describes a social and community listening intervention designed to identify narratives in public online conversations |
| Secondary | Different disease similar story? How global trends identified                                                                                             | Internews                                                                    | 2022 | Report          | Example of an intervention to produce infodemic insights through social and community listening                        |

|           |                                                                                                                                                                                                                              |                                                                |           |                 |                                                                                                   |
|-----------|------------------------------------------------------------------------------------------------------------------------------------------------------------------------------------------------------------------------------|----------------------------------------------------------------|-----------|-----------------|---------------------------------------------------------------------------------------------------|
|           | in the COVID-19 rumor landscape influence conversations around the Monkeypox outbreak                                                                                                                                        |                                                                |           |                 |                                                                                                   |
| Secondary | COVID-19 State of Vaccine Confidence Insights Report                                                                                                                                                                         | US CDC                                                         | 2021-2023 | Report          | Example of an intervention to produce infodemic insights through social and community listening   |
| Secondary | Using Machine Learning Technology (Early Artificial Intelligence–Supported Response With Social Listening Platform) to Enhance Digital Social Understanding for the COVID-19 Infodemic: Development and Implementation Study | White BK, Gombert A, Nguyen T, <i>et al.</i>                   | 2023      | Journal article | Describes the use of artificial intelligence to enhance a social and community listening activity |
| Secondary | How to build an infodemic insights report in six steps                                                                                                                                                                       | WHO, UNICEF                                                    | 2023      | Manual          | Provides an overview of steps required to develop an infodemic insights report                    |
| Secondary | WHO launches pilot of AI-powered public-access social listening tool                                                                                                                                                         | WHO                                                            | 2021      | News story      | Provides a brief overview of how information voids can be filled                                  |
| Secondary | Combating Misinformation as a Core Function of Public Health                                                                                                                                                                 | Knudsen J, Perlman-Gabel M, Uccelli IG, Jeavons J, Chokshi DA. | 2023      | Journal article | Describes an intervention designed to proactively fill information voids                          |



|           |                                                                                                                                                                     |                                                           |      |                              |                                                                                                             |
|-----------|---------------------------------------------------------------------------------------------------------------------------------------------------------------------|-----------------------------------------------------------|------|------------------------------|-------------------------------------------------------------------------------------------------------------|
| Secondary | Singing Sensitization: Delivering accurate health information to vulnerable and hard-to-reach communities using live music performances                             | WHO, Doctors for Madagascar                               | 2022 | Case study                   | Describes an intervention designed to proactively fill information voids                                    |
| Secondary | Infodemic Management in the Twenty-First Century. In: Managing Infodemics in the 21st Century: Addressing New Public Health Challenges in the Information Ecosystem | Purnat TD, Purnat TD, Nguyen T, Briand S, editors.        | 2023 | Book chapter                 | Discusses potential ways to address information voids arising from scientific uncertainty                   |
| Secondary | Leveraging infodemiologists to counteract online misinformation: Experience with COVID-19 vaccines                                                                  | Gorman JM, Scales DA.                                     | 2022 | Journal article (commentary) | Discusses potential ways to address information voids arising from scientific uncertainty                   |
| Secondary | Prebunking messaging to inoculate against COVID-19 vaccine misinformation: an effective strategy for public health                                                  | Vivion M, Anassour Laouan Sidi E, Betsch C, <i>et al.</i> | 2022 | Journal article              | Describes a study that assessed the effectiveness of prebunking communication strategies                    |
| Tertiary  | Correction as a Solution for Health Misinformation on Social Media                                                                                                  | Vraga EK, Bode L.                                         | 2020 | Journal article (commentary) | Provides an overview of best practices in debunking with an intervention example in the context of COVID-19 |

|          |                                                                                                              |                                                |      |                              |                                                                                                                                      |
|----------|--------------------------------------------------------------------------------------------------------------|------------------------------------------------|------|------------------------------|--------------------------------------------------------------------------------------------------------------------------------------|
| Tertiary | Healthcare professionals' acts of correcting health misinformation on social media                           | Bautista JR, Zhang Y, Gwizdka J.               | 2021 | Journal article              | Describes a study that explored how healthcare professionals correct health misinformation on social media                           |
| Tertiary | COVID-19 Vaccine Fact-Checking Posts on Facebook: Observational Study                                        | Xue H, Gong X, Stevens H.                      | 2022 | Journal article              | Describes a study that analyzed trends and effects of fact-checking interventions on social media                                    |
| Tertiary | The differential effects of a governmental debunking campaign concerning COVID-19 vaccination misinformation | Helfers A, Ebersbach M.                        | 2023 | Journal article              | Describes a study that evaluated the effectiveness of a debunking campaign in decreasing misinformation belief and vaccine hesitancy |
| Tertiary | Risk communication and community engagement strategies for COVID-19 in 13 African countries                  | Adebisi YA, Rabe A, Lucero-Prisno Iii DE.      | 2021 | Journal article              | Reviews public communications and community engagement interventions implemented in various countries                                |
| Tertiary | Concrete Recommendations for Cutting Through Misinformation During the COVID-19 Pandemic                     | Donovan J.                                     | 2020 | Journal article (commentary) | Provides a brief overview of search engine optimization strategies that health authorities can adopt                                 |
| Tertiary | Tennessee COVID-19 Health Disparity Task Force Builds Trust to Battle Misinformation                         | US CDC                                         | 2022 | Case study                   | Describes a public communications and community engagement intervention that employed trusted messengers                             |
| Tertiary | A Multifaceted Campaign to Combat COVID-19                                                                   | Silesky MD, Panchal D, Fields M, <i>et al.</i> | 2022 | Journal article              | Describes an adaptive public communications and community engagement intervention                                                    |

|          |                                                                                                                               |                                                                |      |                              |                                                                                                                                                           |
|----------|-------------------------------------------------------------------------------------------------------------------------------|----------------------------------------------------------------|------|------------------------------|-----------------------------------------------------------------------------------------------------------------------------------------------------------|
|          | Misinformation in the Hispanic Community                                                                                      |                                                                |      |                              |                                                                                                                                                           |
| Tertiary | Measuring the effect of Facebook's downranking interventions against groups and websites that repeatedly share misinformation | Vincent EM, Théro H, Shabayek S.                               | 2022 | Journal article              | Describes a study that evaluated the implementation and effects of a content moderation intervention on social media                                      |
| Tertiary | The spread of COVID-19 conspiracy theories on social media and the effect of content moderation                               | Papakyriakopoulos O, Serrano JCM, Hegelich S.                  | 2020 | Journal article              | Describes a study that evaluated the effectiveness of content moderation interventions on social media                                                    |
| Tertiary | WHO and digital agencies: how to effectively tackle COVID-19 misinformation online                                            | Germani F, Pattison AB, Reinfelde M.                           | 2022 | Journal article (commentary) | Discusses an example of how health authorities can potentially contribute to content moderation interventions on social media                             |
| Tertiary | Fighting COVID-19 misinformation on social media: Experimental evidence for a scalable accuracy-nudge intervention            | Pennycook G, McPhetres J, Zhang Y, Lu JG, Rand DG.             | 2020 | Journal article              | Describes a study that examined whether an accuracy nudge intervention can improve participants' choices about what they share on social media            |
| Tertiary | Developing an accuracy-prompt toolkit to reduce COVID-19 misinformation online                                                | Epstein Z, Berinsky AJ, Cole R, Gully A, Pennycook G, Rand DG. | 2021 | Journal article              | Describes an experiment that examined participants' intentions to share true and false news headlines, with implications for accuracy nudge interventions |

|          |                                                                 |                                                                  |      |                 |                                                                                                                                       |
|----------|-----------------------------------------------------------------|------------------------------------------------------------------|------|-----------------|---------------------------------------------------------------------------------------------------------------------------------------|
| Tertiary | Shifting attention to accuracy can reduce misinformation online | Pennycook G, Epstein Z, Mosleh M, Arechar AA, Eckles D, Rand DG. | 2021 | Journal article | Describes a series of studies that examined how shifting attention to accuracy can affect the quality of news that participants share |
|----------|-----------------------------------------------------------------|------------------------------------------------------------------|------|-----------------|---------------------------------------------------------------------------------------------------------------------------------------|
